# Supplementary material for: Appropriate Timing of Gestational Diabetes Mellitus Diagnosis in Medium- and Low-Risk Women: Effectiveness of the Italian NHS Recommendations in Preventing Fetal Macrosomia
Source: Hindawi journal article supplement (doi:10.1155/2020/5393952), 2020-09-18
Supplement: f1 [file 5393952.f1.pdf]

**Supplementary Table 1:** Comparison of fetal biometry and neonates' BW by gestational age between normal glucose tolerant women and women diagnosed with GDM at 24-28 weeks of gestation grouped into distinct NHS risk categories.

| Biometric parameters (percentiles) | Normal glucose tolerant women, N=550 (A) | HR women with GDM, N=67 (B) | MR women with GDM, N=97 (C) | LR women with GDM, N=24 (D) | P value (A vs B) | P value (A vs C) | P value (A vs D) | P value (B vs C) | P value (B vs D) |
|------------------------------------|------------------------------------------|-----------------------------|-----------------------------|-----------------------------|------------------|------------------|------------------|------------------|------------------|
| Anomaly scan (weeks of gestation)  | 20.6±0.6                                 | 20.6 ± 0.5                  | 20.8 ± 0.6                  | 21.0 ± 0.5                  | 0.603            | 0.399            | 0.060            | 0.920            | 0.231            |
| HC                                 | 48.7±21.7                                | 53.9±26.2                   | 53.7±24.3                   | 50.8±25.2                   | 0.101            | 0.070            | 0.723            | 0.883            | 0.617            |
| BPD                                | 44.8±23.3                                | 51.1±25.2                   | 50.7±26.6                   | 54.1±24.1                   | 0.064            | 0.011            | 0.063            | 0.976            | 0.471            |
| TCD                                | 49.7±13.9                                | 49.0±13.9                   | 47.2±15.1                   | 51.3±15.0                   | 0.977            | 0.104            | 0.704            | 0.199            | 0.763            |
| AC                                 | 47.1±20.6                                | 63.1±23.7                   | 52.9±24.7                   | 51.4±23.8                   | <0.001           | 0.014            | 0.291            | 0.008            | 0.052            |
| FL                                 | 43.7±22.4                                | 52.4±23.6                   | 48.5±25.5                   | 49.9±26.1                   | 0.006            | 0.090            | 0.325            | 0.277            | 0.573            |
| EFW                                | 46.4±20.4                                | 61.5±23.2                   | 52.5±24.3                   | 51.2±23.8                   | <0.001           | 0.025            | 0.481            | 0.018            | 0.059            |
| Delivery (weeks of gestation)      | 39.1±1.5                                 | 38.0±1.9                    | 38.0±1.8                    | 38.8±1.6                    | <0.001           | <0.001           | 0.230            | 0.674            | 0.112            |
| BW                                 | 41.0±27.1                                | 56.2±27.1                   | 40.7±27.7                   | 36.0±27.4                   | <0.001           | 0.571            | 0.444            | <0.001           | 0.007            |

Data are expressed as mean ± SD. HR, high-risk; MR, medium risk; LR, low risk; HC, head circumference; BPD, biparietal diameter; TCD, transcerebellar diameter; AC, abdominal circumference; FL, femur length; EFW, estimated fetal weight; BW, birthweight. Differences between groups are compared with the Mann-Whitney test.

**Supplementary Table 2.** Effects of GDM that was diagnosed at 24-28 weeks of gestation on fetal growth and neonates' BW by gestational age.

| Biometric parameters (percentiles) | Normal glucose tolerant women,<br>vs<br>HR women with GDM |                | Normal glucose tolerant women,<br>vs<br>MR and LR women with GDM |                | HR women with GDM<br>vs<br>MR and LR women with GDM |                |
|------------------------------------|-----------------------------------------------------------|----------------|------------------------------------------------------------------|----------------|-----------------------------------------------------|----------------|
|                                    | <b>Beta (95% CI)</b>                                      | <b>P value</b> | <b>Beta (95% CI)</b>                                             | <b>P value</b> | <b>Beta (95% CI)</b>                                | <b>P value</b> |
| AC                                 | 0.245 (0.161–0.329)                                       | <0.001         | 0.087 (0.008–0.166)                                              | 0.030          | -0.078 (-0.229–0.073)                               | 0.310          |
| EFW                                | 0.227 (0.142–0.312)                                       | <0.001         | 0.094 (0.016–0.172)                                              | 0.019          | -0.089 (-0.241 – -0.063)                            | 0.250          |
| BW                                 | 0.185 (0.100–0.270)                                       | 0.003          | -0.033 (-0,113–0.047)                                            | 0.416          | -0.243 (-0,398 – -0.088)                            | 0.002          |

HR, high risk; MR, medium risk; LR, low risk; AC, abdominal circumference; EFW, estimated fetal weight; BW, birthweight. Maternal age, family history of T2D, parity, previous GDM, and educational status were added as covariates in linear regression analysis.
